# Supplementary material for: Exonuclease I-aided homogeneous electrochemical strategy for organophosphorus pesticide detection based on enzyme inhibition integrated with a DNA conformational switch
Source: Royal Society of Chemistry journal article supplement (doi:10.1039/c5an02374b), 2016-01-01
Supplement: c5an02374b1.pdf [file c5an02374b1.pdf]

## Supporting Information

**Exonuclease I-aided homogeneous electrochemical strategy for  
organophosphorus pesticide detection based on enzyme inhibition  
integrated with DNA conformational switch**

**Xiuzhong Wang, Shanshan Dong, Ting Hou, Lei Liu, Xiaojuan Liu, Feng Li\***

College of Chemistry and Pharmaceutical Sciences, Qingdao Agricultural University,  
Qingdao 266109, China

\* Corresponding author. E-mail: [lifeng@qust.edu.cn](mailto:lifeng@qust.edu.cn); Tel/Fax: +86-532-86080855

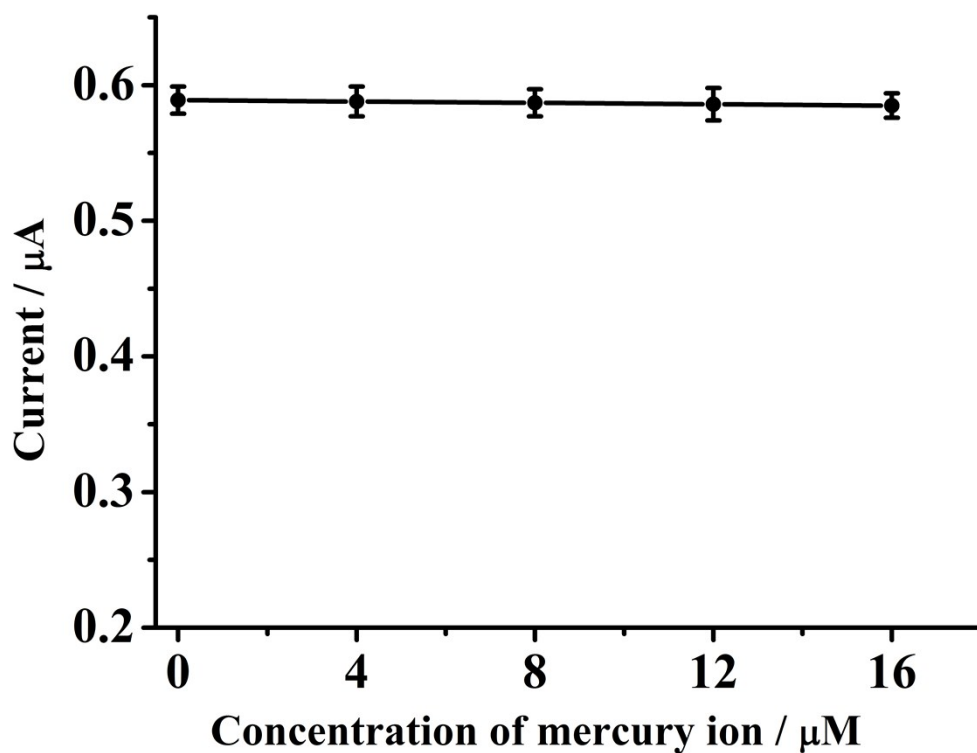

**Fig. S1** Electrochemical currents of the reaction system (with HP1 substituted by HP2) in the presence of  $\text{Hg}^{2+}$  with different concentrations. The error bars represent the standard deviation of three measurements. The concentrations of HP2 and Exo I were  $2 \mu\text{M}$  and 20 U, respectively.

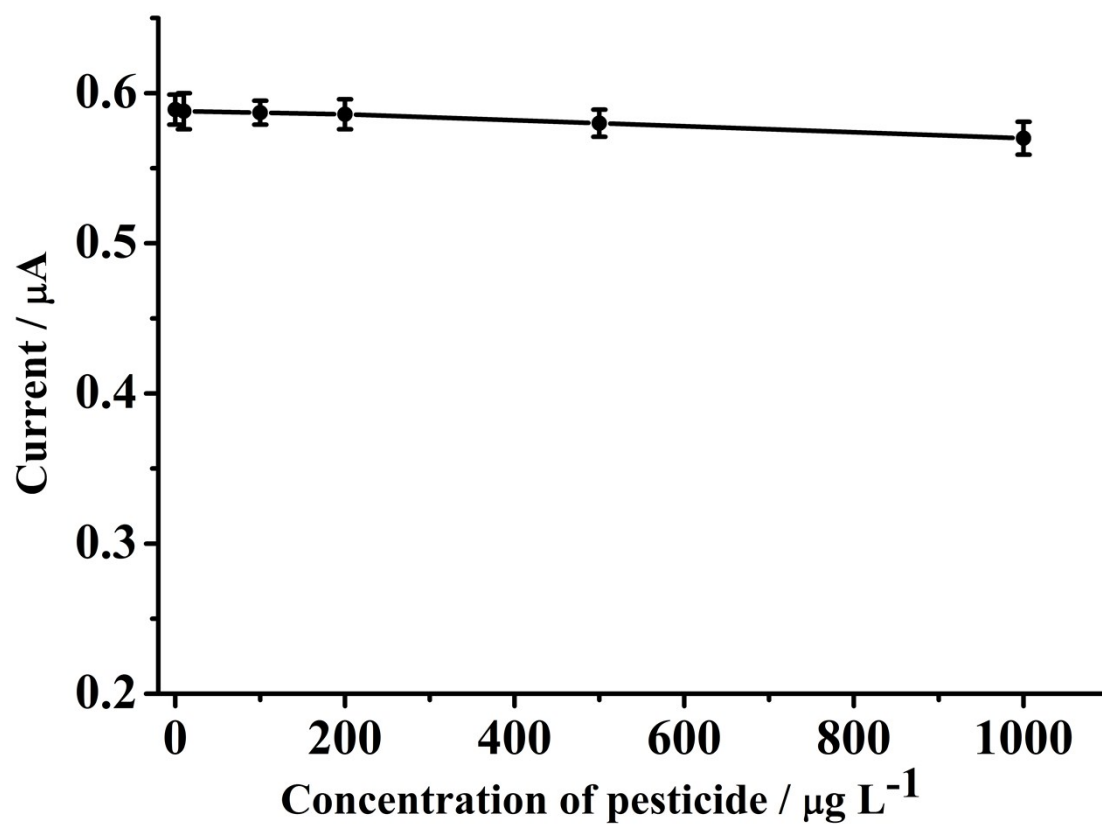

**Fig. S2** Electrochemical currents of the reaction system (with HP1 substituted by HP2) in the presence of pesticides with different concentrations. The error bars represent the standard deviation of three measurements. The concentrations of HP2 and Exo I were 2  $\mu\text{M}$  and 20 U, respectively.

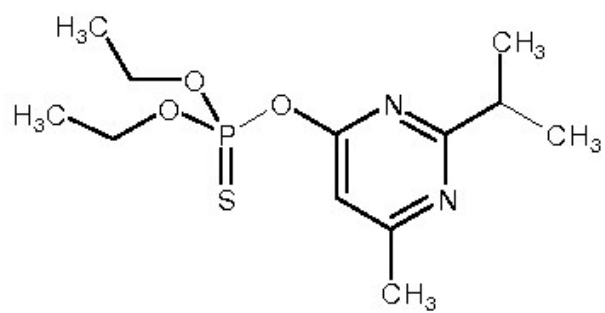

**Fig. S3** The chemical structure of diazinon

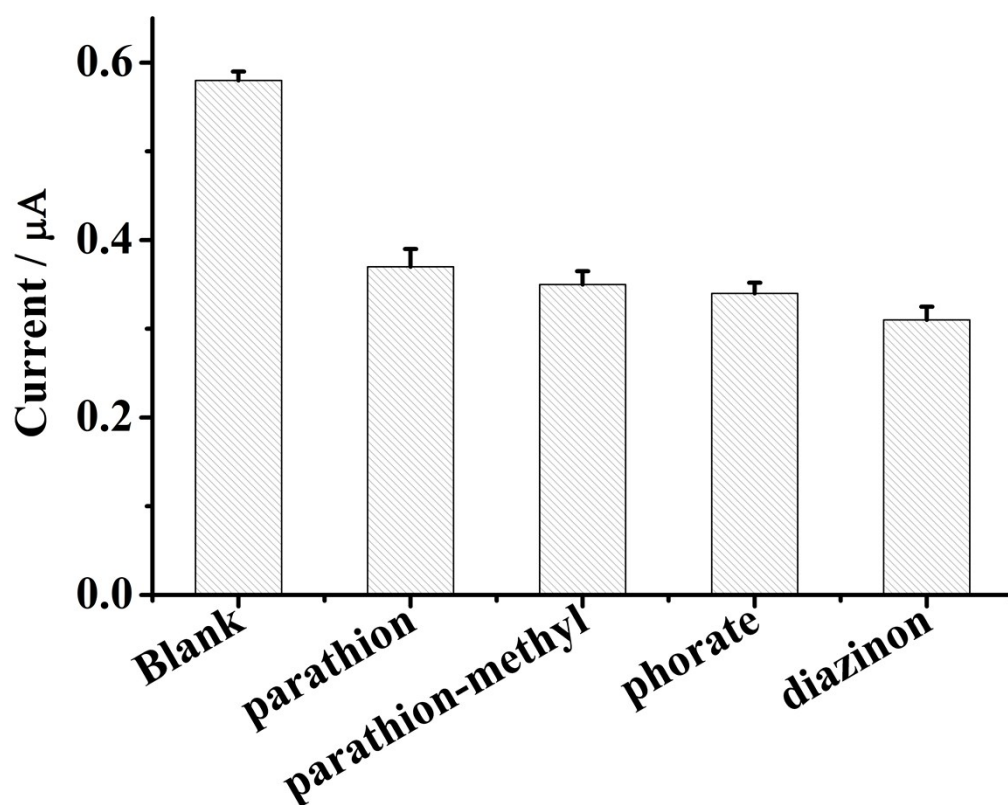

**Fig. S4** Electrochemical response of the biosensing platform in the presence of parathion, parathion-methyl, phorate and diazinon, respectively, in which “blank” indicates the condition in the absence of pesticides. The concentrations of the above pesticides were all  $20 \mu\text{g L}^{-1}$ . The error bars represent the standard deviation of three measurements.

**Table S1 Precision (RSD %) and accuracy (Recovery %) of diazinon spiked into artificial lake water and apples extract solution samples**

| Samples                    | Amount added<br>( $\mu\text{g/L}$ ) | Amount measured<br>( $\mu\text{g/L}$ ) | RSD (%)<br>(n=6) | Recovery<br>(%) | HPLC<br>results*<br>( $\mu\text{g/L}$ ) |
|----------------------------|-------------------------------------|----------------------------------------|------------------|-----------------|-----------------------------------------|
| Artificial lake<br>water   | 5.00                                | 5.40                                   | 6.31             | 108             | 5.12                                    |
|                            | 10.00                               | 9.73                                   | 4.50             | 97.3            | 10.08                                   |
|                            | 50.00                               | 50.52                                  | 5.77             | 101             | 49.67                                   |
| Apples extract<br>solution | 5.00                                | 5.31                                   | 5.52             | 106             | 4.95                                    |
|                            | 10.00                               | 9.96                                   | 4.38             | 99.6            | 9.80                                    |
|                            | 50.00                               | 47.52                                  | 7.01             | 95.0            | 48.33                                   |

\* The concentration of OPs was analyzed by HPLC according to the literature<sup>1</sup>.

Reference:

1. Y.H. Yi, G.B. Zhu, C. Liu, Y. Huang, Y.Y. Zhang, H.T. Li, J.N. Zhao and S.Z. Yao, *Anal. Chem.*, 2013, 85, 11464-11470.
